# Supplementary material for: Conditional Antibody Expression to Avoid Central B Cell Deletion in a Humanized HIV-1 Vaccine Mouse Models
Source: bioRxiv or medRxiv preprint supplement (doi:10.1101/2020.01.03.894279), 2020-01-03
Supplement: Supplementary file [file media-1.pdf]

**Figure S1**

**A.**

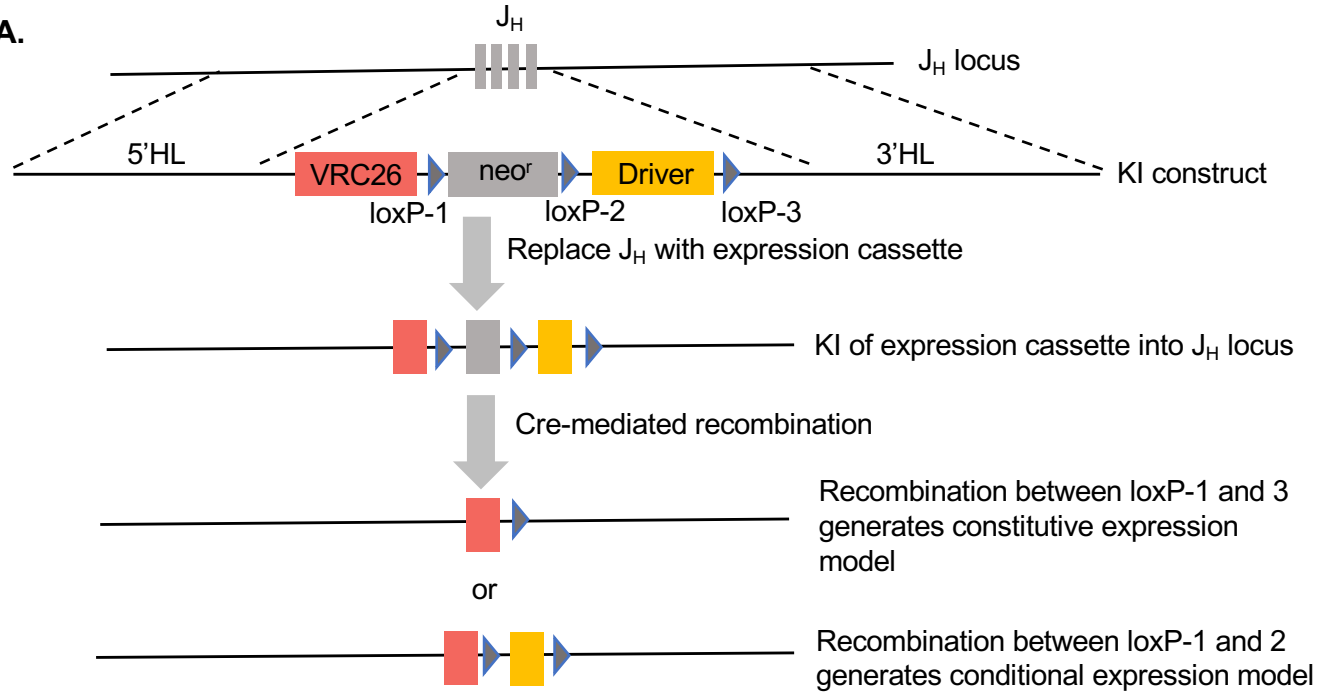

**B.**

| Digest     | Probe    | Germline | Constitutive model | Conditional model |
|------------|----------|----------|--------------------|-------------------|
| EcoRV      | $J_H$ 3' | 16,530bp | 10,808bp           | 10,968bp          |
| NheI       | $J_H$ 5' | 5,509bp  | 13,863bp           | 7,729bp           |
| EcoRV+SpeI | $J_k$ 3' | 8,653bp  | 5,502bp            | 5,502bp           |
| PstI       | $J_k$ 5' | 7,006bp  | 5,263bp            | 5,263bp           |

**C.**

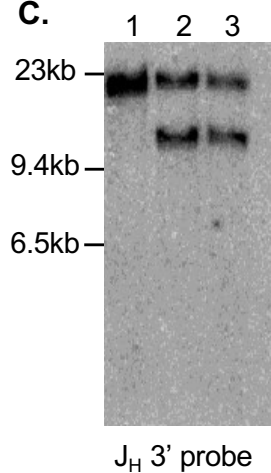

**D.**

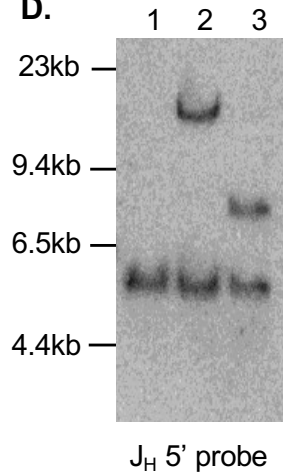

**E.**

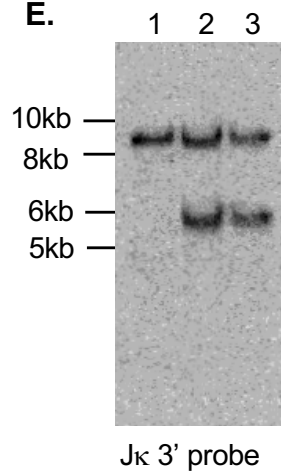

**F.**

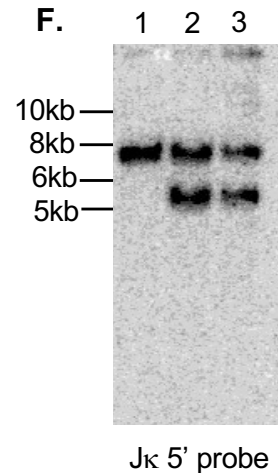

**Figure S2**

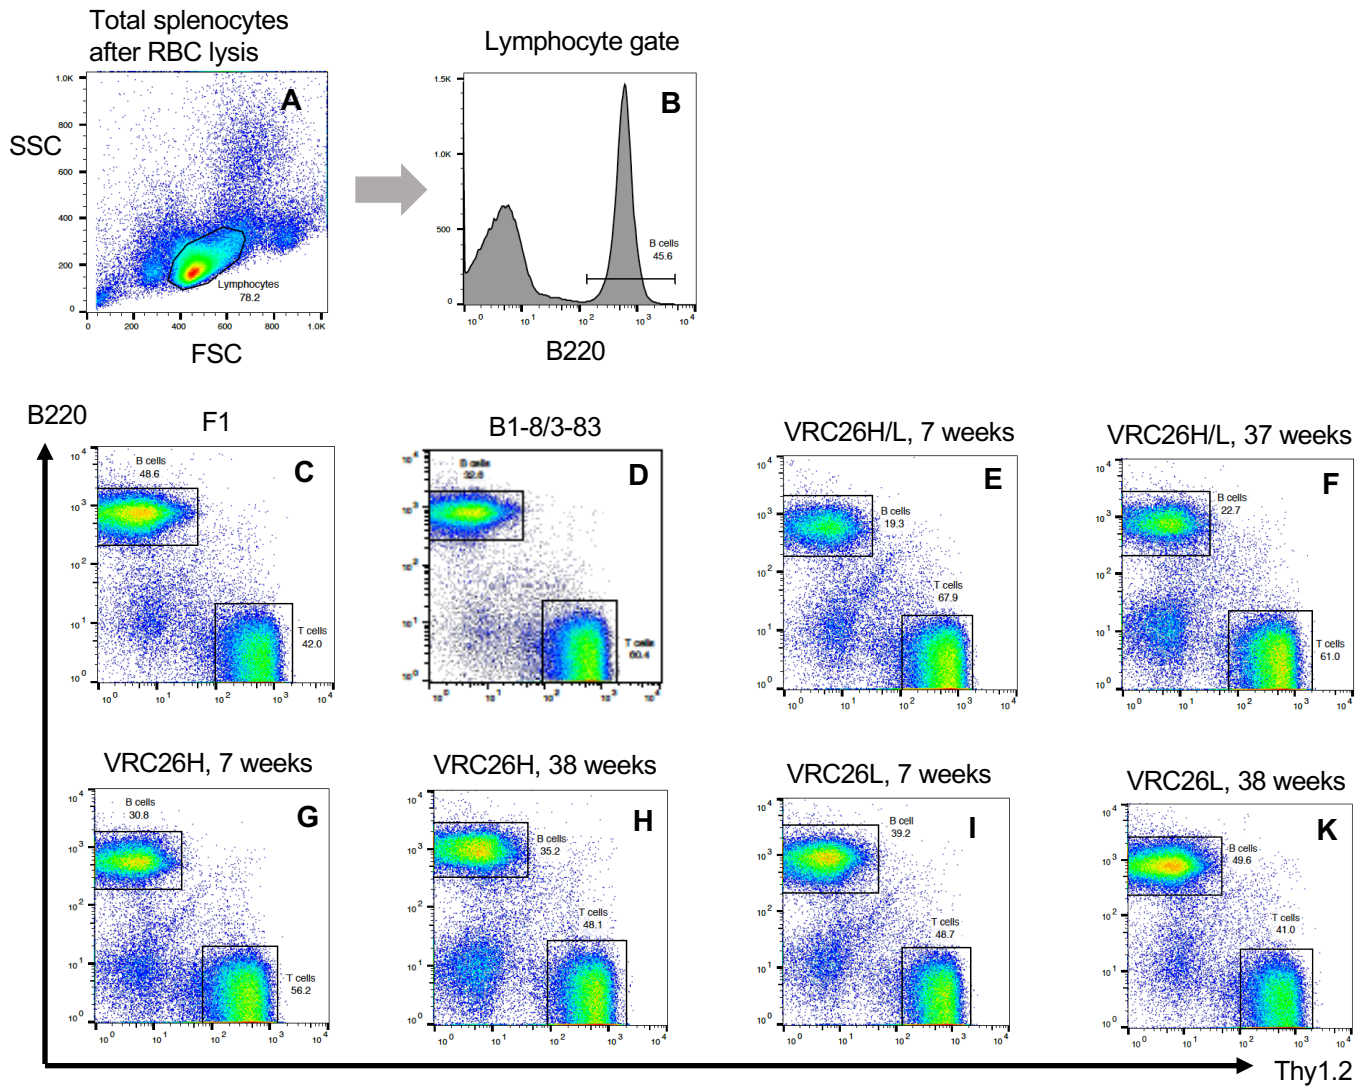

**Figure S3**

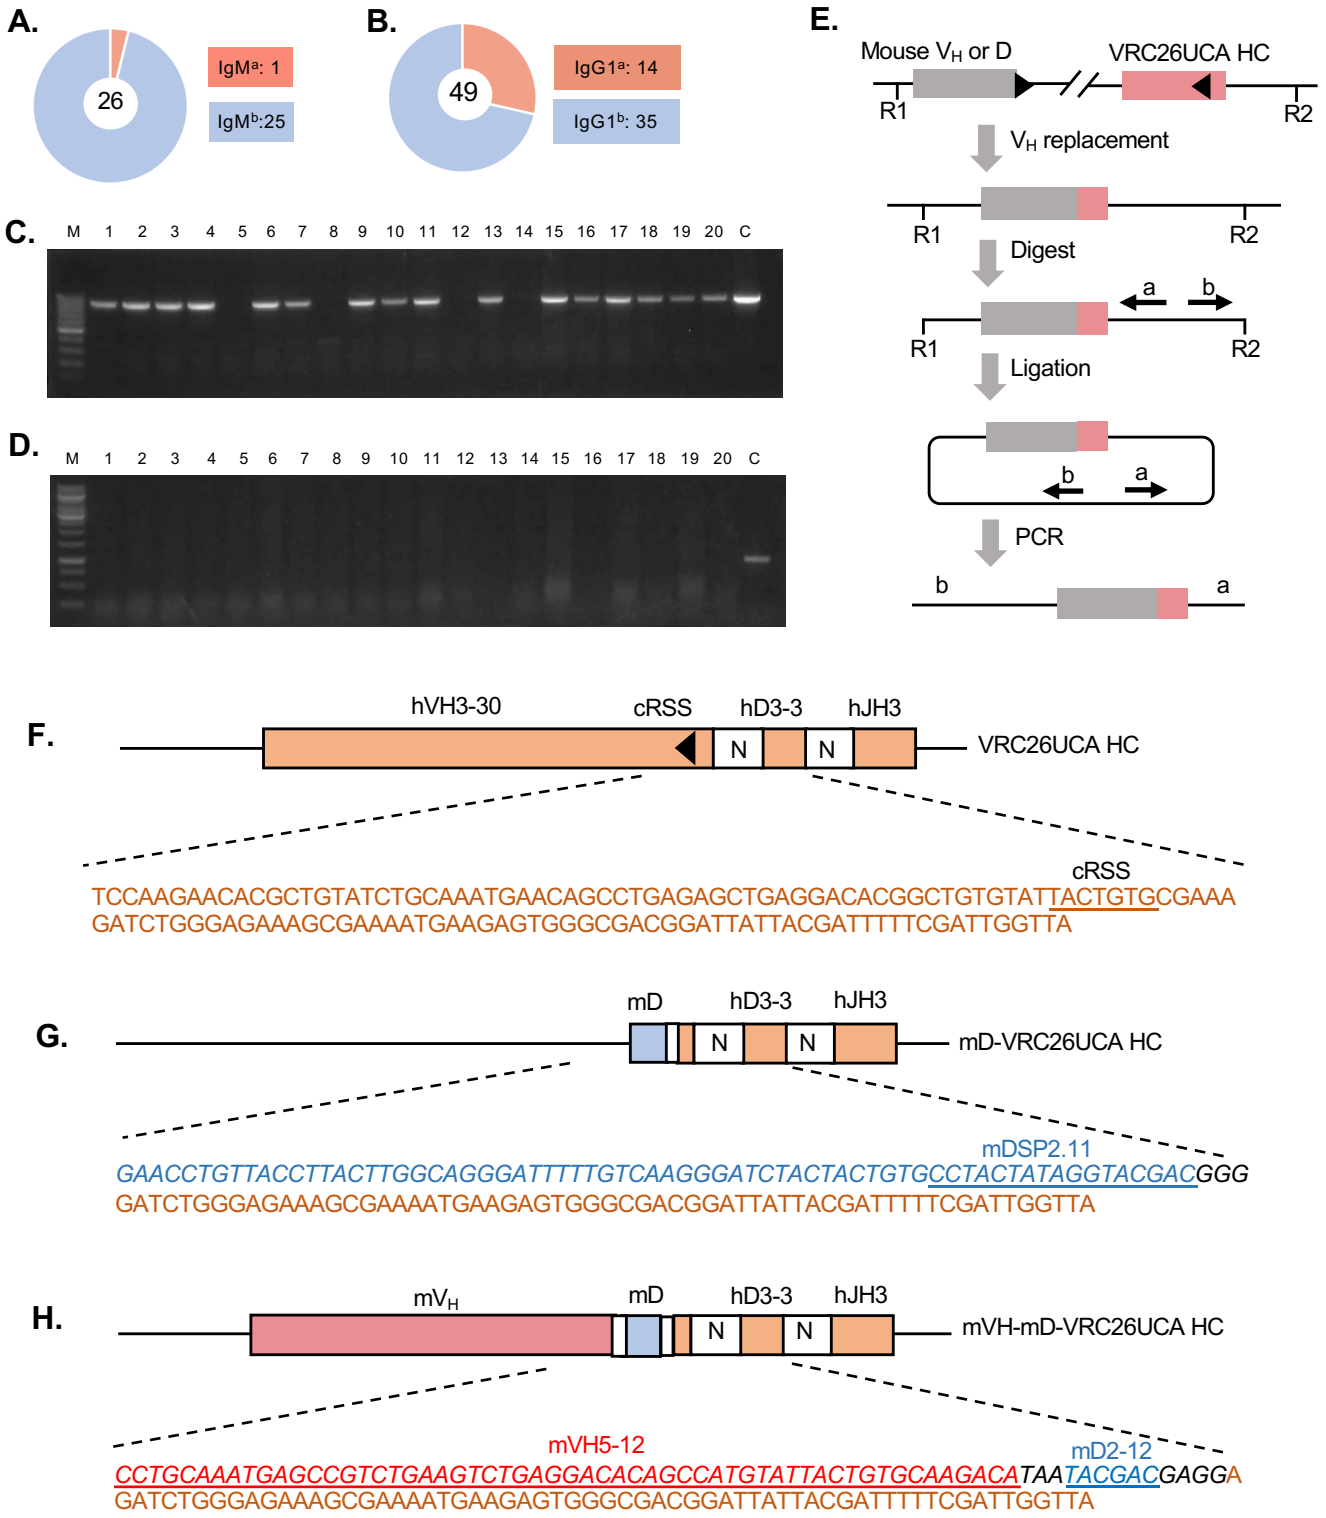

Figure S4

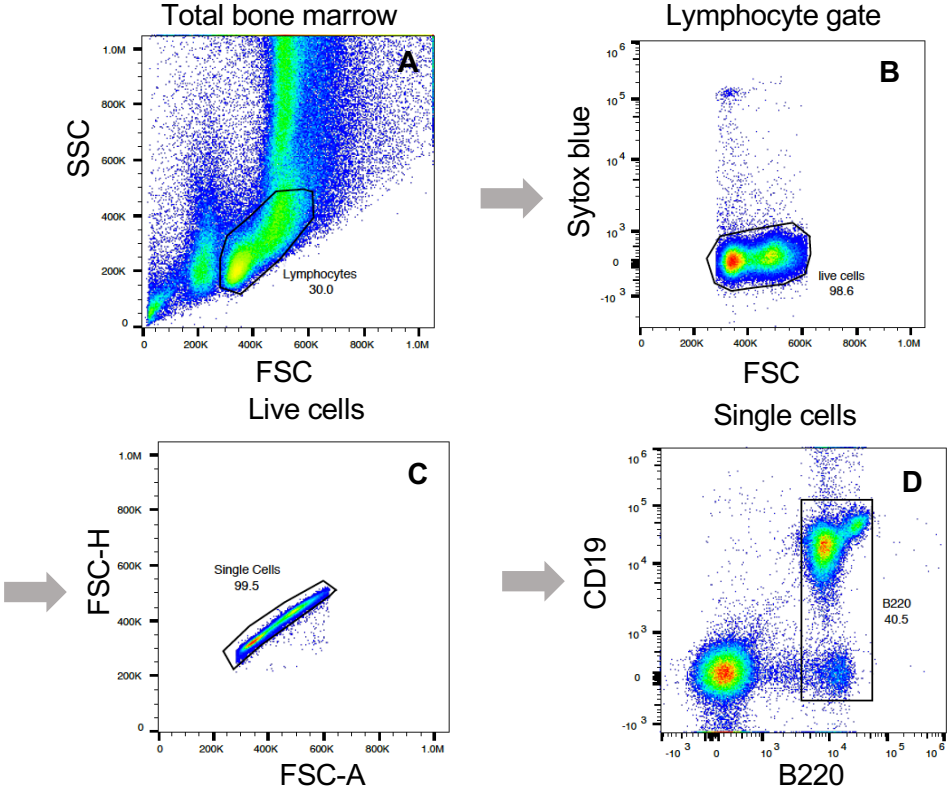

Figure S5

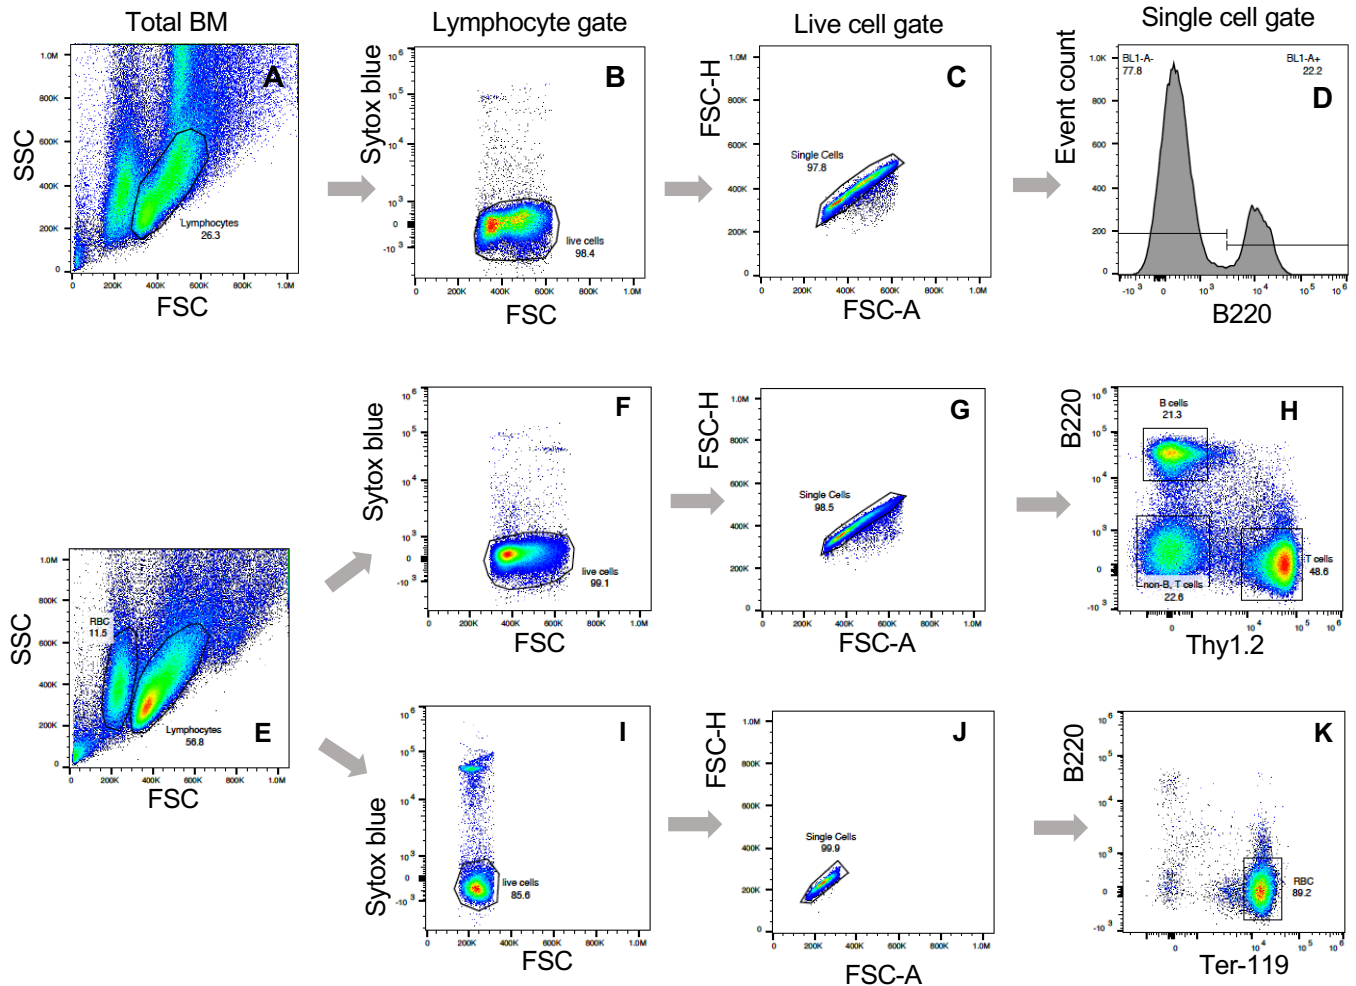

**Figure S6**

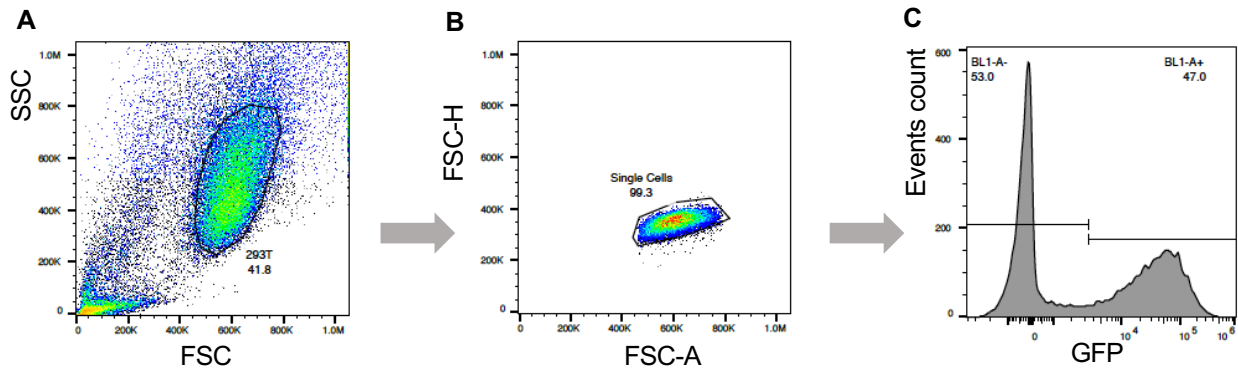

**D. GFP+ cells (%) in HC/mVpreB/mλ5 transfection**

|                | Driver | VRC26 | VHB1-8 |
|----------------|--------|-------|--------|
| Transfection 1 | 47.0   | 39.6  | 44.0   |
| Transfection 2 | 47.3   | 38.2  | 43.1   |
| Transfection 3 | 44.0   | 43.1  | 41.7   |
| Average        | 46.1   | 40.3  | 42.9   |

**E. GFP+ cells (%) in HC/LC transfection**

|                | Driver | VRC26 | VHB1-8 |
|----------------|--------|-------|--------|
| Transfection 1 | 54.4   | 49.1  | 48.9   |
| Transfection 2 | 47.7   | 50.7  | 51.4   |
| Transfection 3 | 47.7   | 48.0  | 48.8   |
| Average        | 49.9   | 49.3  | 49.7   |

**F. GFP+ cells (%) in HC/hVpreB/hλ5 transfection**

|                | Driver | VRC26 |
|----------------|--------|-------|
| Transfection 1 | 52.2   | 52.1  |
| Transfection 2 | 49.0   | 49.9  |
| Transfection 3 | 54.2   | 52.7  |
| Average        | 51.8   | 51.6  |

**G. GFP+ cells (%) in HC/hVpreB/mλ5 transfection**

|                | Driver | VRC26 |
|----------------|--------|-------|
| Transfection 1 | 40.9   | 38.0  |
| Transfection 2 | 40.7   | 40.5  |
| Transfection 3 | 40.1   | 38.0  |
| Average        | 40.6   | 38.8  |

**H. GFP+ cells (%) in HC/mVpreB/hλ5 transfection**

|                | Driver | VRC26 |
|----------------|--------|-------|
| Transfection 1 | 53.1   | 55.0  |
| Transfection 2 | 54.8   | 52.0  |
| Transfection 3 | 53.7   | 52.0  |
| Average        | 53.9   | 53.0  |

Figures S7

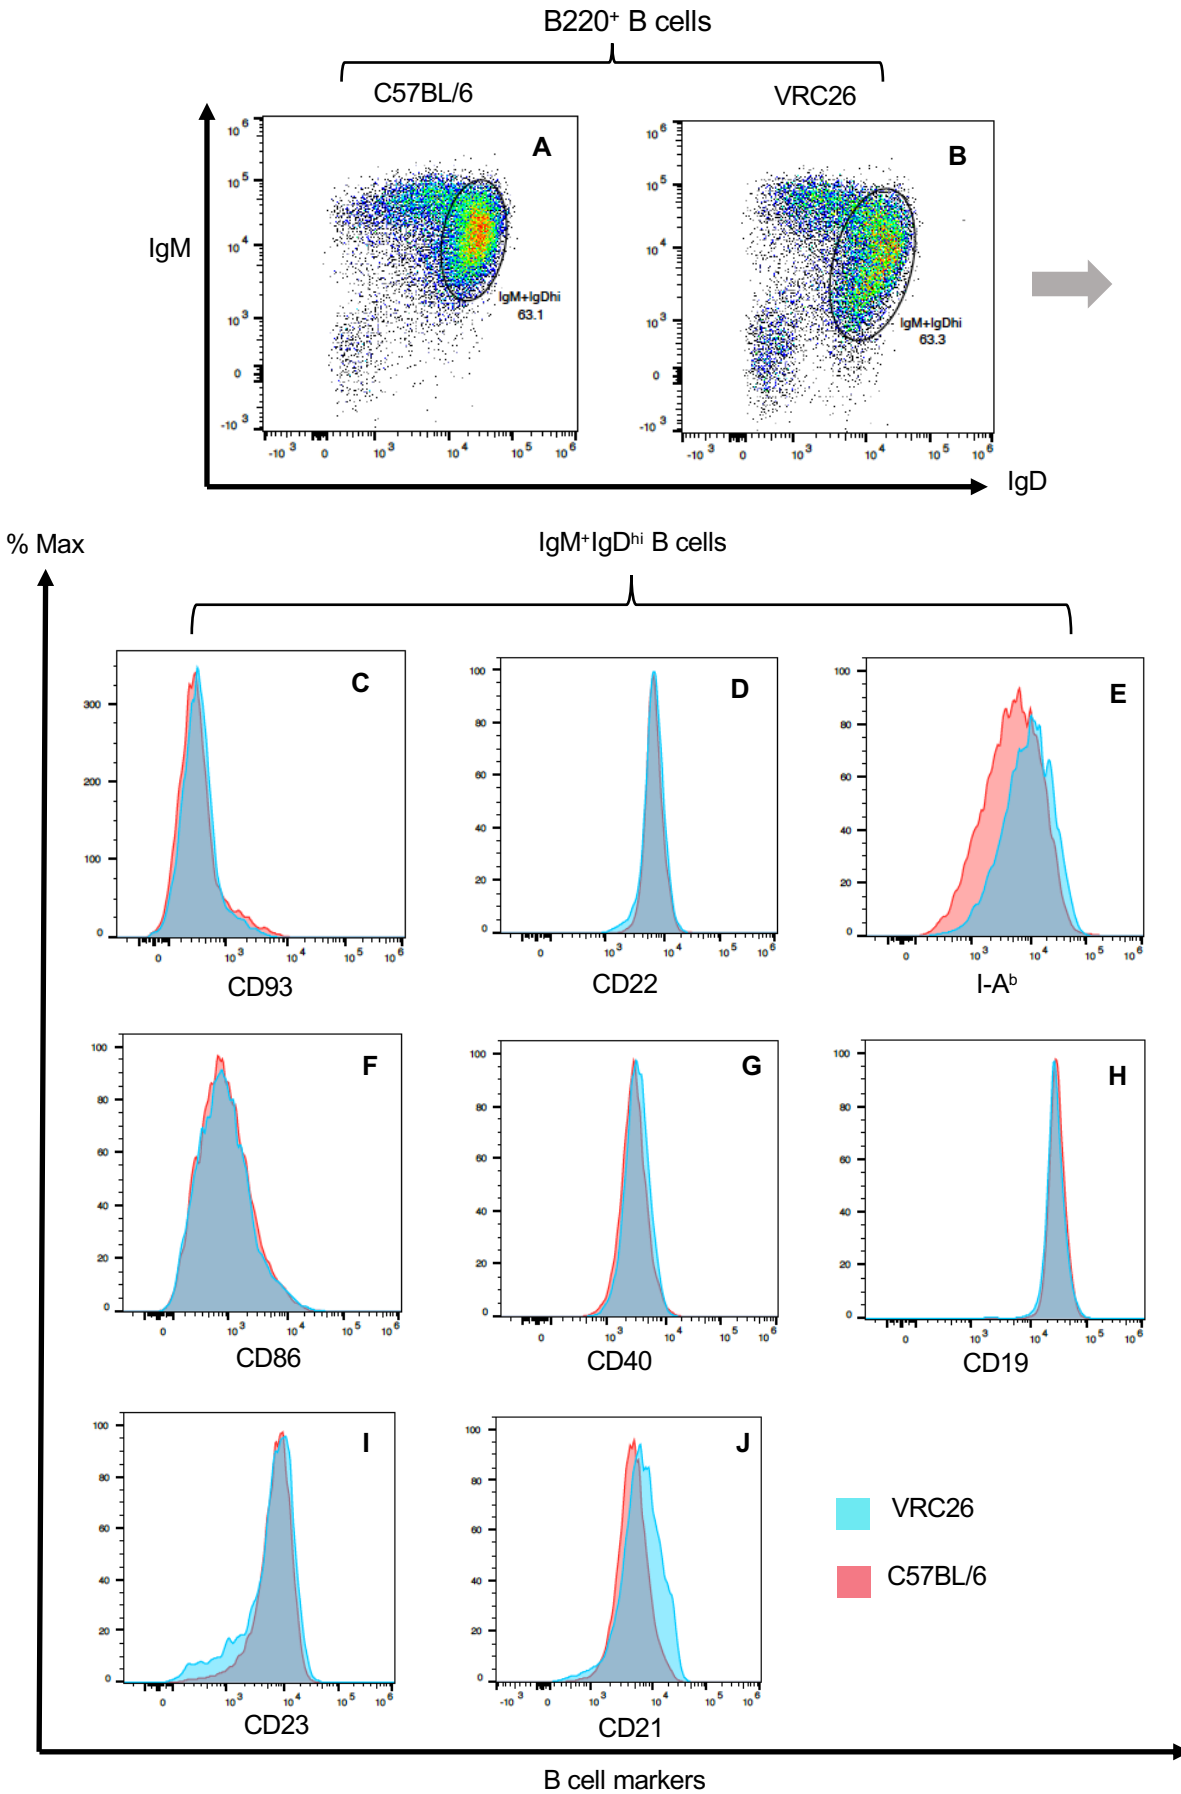

**Figure S8**

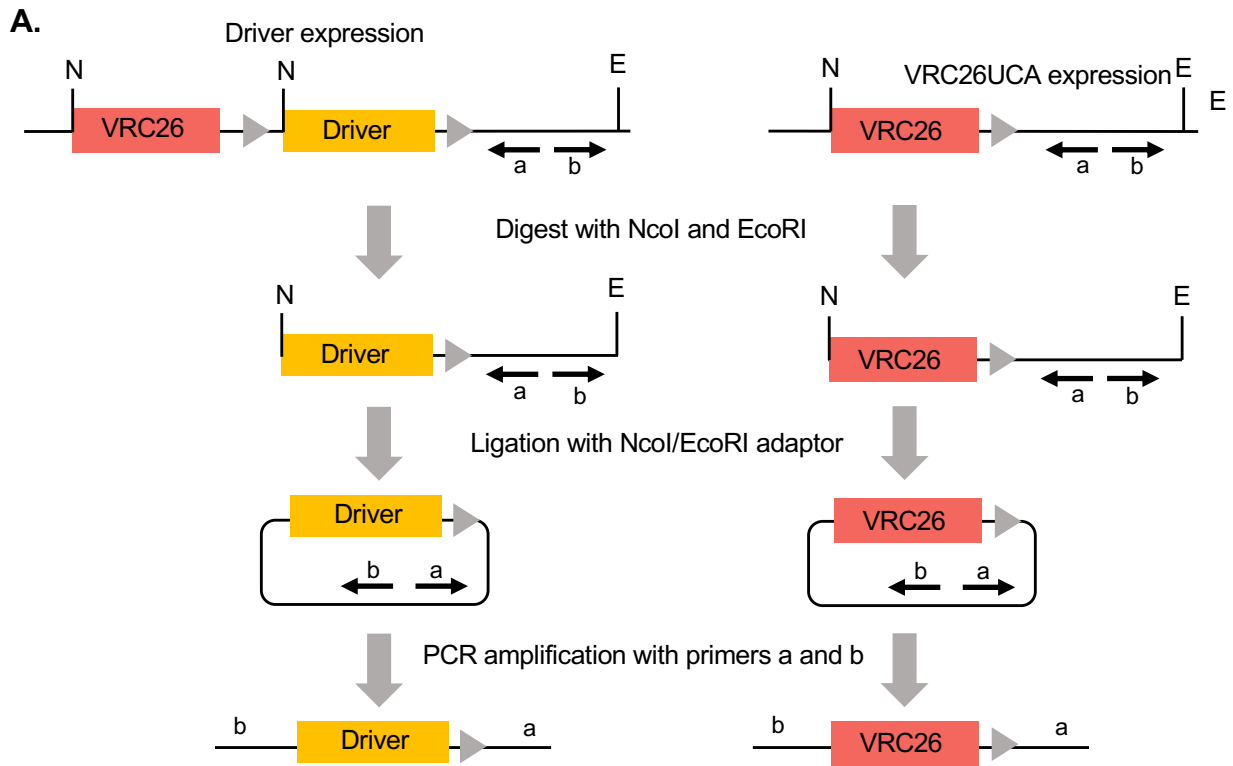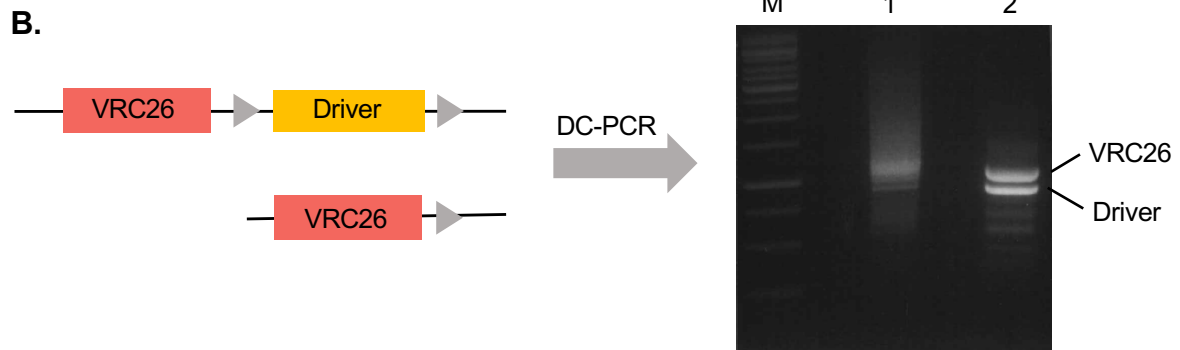



**Figure S9**

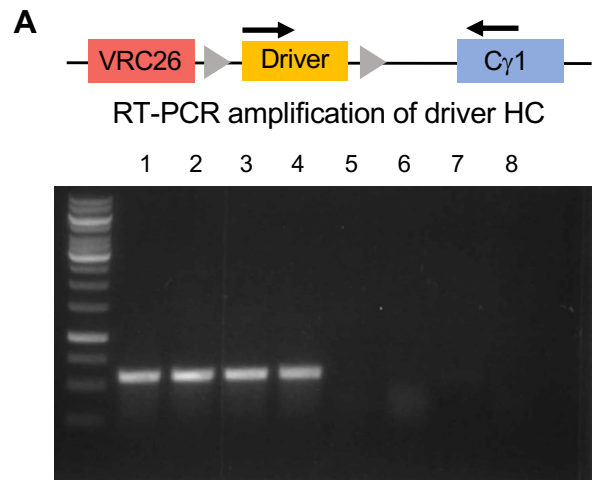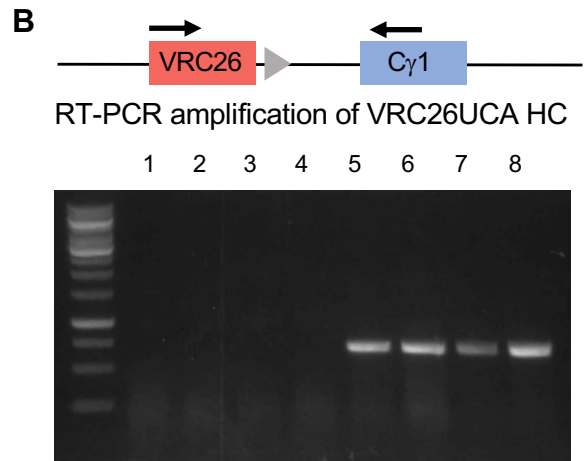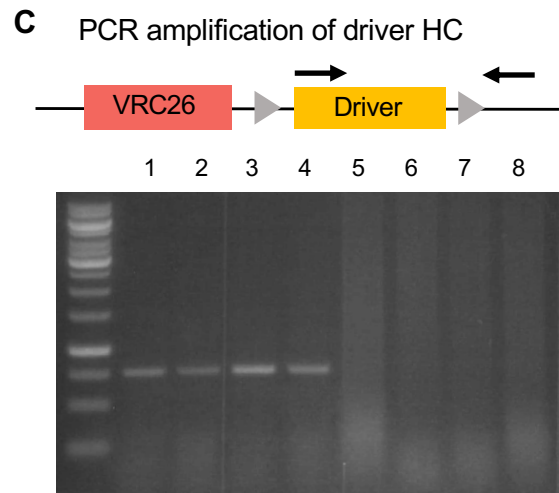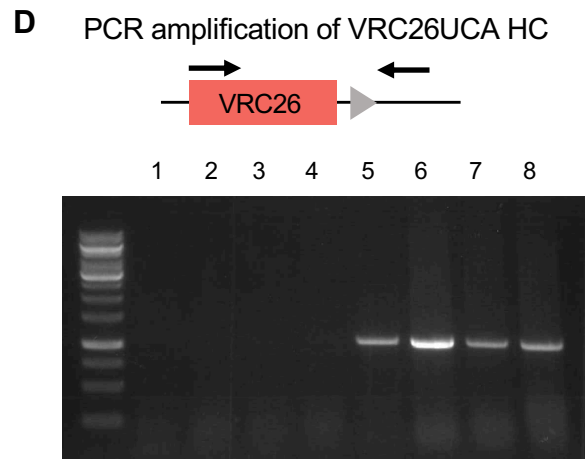

**Table S1**

Summary of VH replacement events in hybridomas from VRC26UCA KI mouse

| Hybridoma clone | Mouse VH     | Mouse D     | P/NP *                      | Antibody |
|-----------------|--------------|-------------|-----------------------------|----------|
| 1               | -            | IGHD2-10*02 | NP, no VH                   | IgMb     |
| 2               | -            | IGHD2-3*01  | NP, no VH                   | IgMb     |
| 3               | -            | IGHD2-14*01 | NP, no VH                   | IgMb     |
| 4               | -            | IGHD2-10*02 | NP, no VH                   | IgMb     |
| 5               | -            | IGHD2-10*02 | NP, no VH                   | IgMb     |
| 6               | -            | DSP2.8      | NP, no VH                   | IgG1b    |
| 7               | VH5-12*02    | D2-12*01    | NP, out of frame            | IgMb     |
| 8               | IGHV5-6-5*01 | IGHD2-2*01  | NP, out of frame            | IgMb     |
| 9               | IGHV1S81*02  | IGHD2-1*01  | NP, out of frame            | IgMb     |
| 10              | IGHV2-7*01   | -           | NP, out of frame            | IgMb     |
| 11              | IGHV8-2*01   | IGHD2-14*01 | NP, out of frame            | IgG1b    |
| 12              | IGHV9-2*01   | IGHD2-14*01 | NP, inframe with stop codon | IgMb     |
| 13              | IGHV-69*02   | -           | P                           | IgG1b    |
| 14              | IGHV1-26*01# | IGHD2-3*01  | P                           | IgMa     |
| 15              | IGHV8-12*01  | IGH2-4*01   | P                           | IgG1a    |

\* P, productive; NP, non-productive.
